# Supplementary material for: Development and Characterization of a High Density SNP Genotyping Assay for Cattle
Source: PLoS One. 2009 Apr 24;4(4):e5350. doi: 10.1371/journal.pone.0005350 (PMC2669730; doi:10.1371/journal.pone.0005350)
Supplement: Table S6 — Locations and nature of copy number variation loci detected with the BovineSNP50 assay. (0.06 MB XLS) [file pone.0005350.s006.xls]

## Sheet: CNV
Table S6. Locations and nature of copy number variation loci detected with the BovineSNP50 assay.
Chromosome	Start (bp)	End (bp)	Breed	Polymorphism (# Animals)	Size (Mb)	RefSeqIDs	Annotation
1	43653644	43676559	BMA	Homozygous Deletion (1)	0.022915	NM_146993:NM_146997:NM_146996	olfactory receptor 176 (Olfr176); olfactory receptor 178 (Olfr178); olfactory receptor 177 (Olfr177)
	115100787	116331219	SHK	Homozygous Deletion (2)	1.23043	NM_001081295:NM_028136:NM_001114397:NM_001038705:NM_020865:NM_177346:NM_015595:NM_026674	RIKEN cDNA 4631416L12 gene (4631416L12Rik); DEAH (Asp-Glu-Ala-His) box polypeptide 36 (Dhx36); DEAH (Asp-Glu-Ala-His) box polypeptide 36 (DHX36), transcript variant 2; G protein-coupled receptor 149 (GPR149); DEAH (Asp-Glu-Ala-His) box polypeptide 36 (DHX36), transcript variant 1; G protein-coupled receptor 149 (Gpr149); Src homology 3 domain-containing guanine nucleotide exchange factor (SGEF); …
					0
3	72874629	72955979	BMA	Homozygous Deletion (1)	0.08135	NM_152996:NM_011372	ST6 (alpha-N-acetyl-neuraminyl-2,3-beta-galactosyl-1,3)-N-acetylgalactosaminide alpha-2,6-sialyltransferase 3 (ST6GALNAC3); ST6 (alpha-N-acetyl-neuraminyl-2,3-beta-galactosyl-1,3)-N-acetylgalactosaminide alpha-2,6-sialyltransferase 3 (St6galnac3)
	111305176	111410731	SHK	Homozygous Deletion (1)	0.105555
					0
4	84462321	84932596	RGU	Homozygous Deletion (1)	0.470275
	84551840	84977433	CHL	Homozygous Deletion (1)	0.425593
5	57509201	57509201	BMA, NDA, HFD, SGT	Homozygous Deletion (2), Heterozygous (3) and Homozygous Insertion (3)	0
	56968843	56968843	HOL	Homozygous Deletion (2)	0
	57088411	57088411	CHL, ANG, LMS, HOL, BSW, JER, RGU	Homozygous Deletion (40)	0
6	8765761	10526670	SHK	Homozygous Deletion (1)	1.76091	NM_152402:NM_146140	translocation associated membrane protein 1-like 1 (TRAM1L1); translocation associated membrane protein 1-like 1 (Tram1l1)
	44440945	44564876	GIR	Homozygous Deletion (1)	0.123931
	45998638	46028029	BMA	Homozygous Deletion (1)	0.029391
	48179934	48828209	LMS, ANG, RGU	Homozygous (1) and Heterozygous Deletion (2)	0.648275
	110964641	111684341	HFD	Homozygous Deletion (1)	0.7197	NM_005114:NM_010474	heparan sulfate (glucosamine) 3-O-sulfotransferase 1 (HS3ST1); heparan sulfate (glucosamine) 3-O-sulfotransferase 1 (Hs3st1)
7	8307610	8886895	NDA, JER, LMS	Homozygous Deletion (1), Heterozygous Insertion (2)	0.579285	NM_013939:NM_007253:NM_130882:NM_023944:NM_000896:NM_022904:NM_001101445:NM_024444:NM_207175:NM_013940:NM_010998:NM_021319:NM_177307:NM_001101588:NM_178785:NM_021187:NM_052890:NM_013938:NM_134127:NM_173483:NM_001100187:NM_146937:NM_024442:NM_001082:NM_001004466:NM_022434	olfactory receptor, family 10, subfamily H, member 2 (OR10H2); cytochrome P450, family 4, subfamily F, polypeptide 8 (CYP4F8); cytochrome P450, family 4, subfamily f, polypeptide 13 (Cyp4f13); cytochrome P450, family 4, subfamily F, polypeptide 12 (CYP4F12); cytochrome P450, family 4, subfamily F, polypeptide 3 (CYP4F3); RAS protein activator like 3 (RASAL3); cytochrome P450, family 4, subfamily …
	8307610	8538864	CHL	Homozygous Deletion (1)	0.231254	NM_010998:NM_013939:NM_146937:NM_001004466:NM_013938:NM_207175:NM_013940	olfactory receptor 55 (Olfr55); olfactory receptor, family 10, subfamily H, member 2 (OR10H2); olfactory receptor 63 (Olfr63); olfactory receptor, family 10, subfamily H, member 5 (OR10H5); olfactory receptor, family 10, subfamily H, member 3 (OR10H3); olfactory receptor 239 (Olfr239); olfactory receptor, family 10, subfamily H, member 1 (OR10H1)
	38029712	38455264	GIR, NEL, BRM, LMS, HER	Homozygous (3) and Heterozygous Deletion (8)	0.425552	NM_025828:NM_031300:NM_080854:NM_026211:NM_001029886:NM_001004106:NM_011392:NM_017510:NM_019057:NM_003052:NM_013237:NM_016222:NM_029303:NM_001038018:NM_001003258:NM_134059:NM_002082:NM_021489:NM_146045:NM_010106:NM_009000:NM_001031677:NM_025596:NM_000505:NM_001114087:NM_007255:NM_145382:NM_026131:NM_011938:NM_001112711:NM_006480:NM_030567:NM_080881:NM_016662:NM_016758:NM_001114088:NM_001004105:NM…	lectin, mannose-binding 2 (Lman2); MAX dimerization protein 3 (MXD3), transcript variant 1; solute carrier family 34 (sodium phosphate), member 3 (Slc34a3); transmembrane emp24 protein transport domain containing 9 (Tmed9); profilin 3 (PFN3); G protein-coupled receptor kinase 6 (GRK6), transcript variant 1; solute carrier family 34 (sodium phosphate), member 1 (Slc34a1); transmembrane emp24 prote…
	38029712	38650205	GIR, NEL, LMS, HER	Homozygous (1) and Heterozygous Deletion (7)	0.620493	NM_022762:NM_025828:NM_031300:NM_010448:NM_025346:NM_080854:NM_026211:NM_001029886:NM_001004106:NM_011392:NM_017510:NM_019057:NM_003052:NM_013237:NM_001034833:NM_016222:NM_029303:NM_001038018:NM_004499:NM_001003258:NM_134059:NM_002082:NM_021489:NM_146045:NM_015111:NM_010106:NM_009000:NM_001031677:NM_028398:NM_153373:NM_025596:NM_001048061:NM_000505:NM_001114087:NM_007255:NM_145382:NM_026131:NM_01…	required for meiotic nuclear division 5 homolog B (S. cerevisiae) (RMND5B); lectin, mannose-binding 2 (Lman2); MAX dimerization protein 3 (MXD3), transcript variant 1; heterogeneous nuclear ribonucleoprotein A/B (Hnrnpab), transcript variant 2; required for meiotic nuclear division 5 homolog B (S. cerevisiae) (Rmnd5b); solute carrier family 34 (sodium phosphate), member 3 (Slc34a3); transmembrane…
	38029712	38489838	BRM, LMS, HFD	Homozygous (1) and Heterozygous Deletion (5)	0.460126	NM_025828:NM_031300:NM_080854:NM_026211:NM_001029886:NM_001004106:NM_011392:NM_017510:NM_019057:NM_003052:NM_013237:NM_016222:NM_029303:NM_001038018:NM_001003258:NM_134059:NM_002082:NM_021489:NM_146045:NM_010106:NM_009000:NM_001031677:NM_025596:NM_000505:NM_001114087:NM_007255:NM_145382:NM_026131:NM_011938:NM_001112711:NM_006480:NM_030567:NM_080881:NM_016662:NM_016758:NM_001114088:NM_001004105:NM…	lectin, mannose-binding 2 (Lman2); MAX dimerization protein 3 (MXD3), transcript variant 1; solute carrier family 34 (sodium phosphate), member 3 (Slc34a3); transmembrane emp24 protein transport domain containing 9 (Tmed9); profilin 3 (PFN3); G protein-coupled receptor kinase 6 (GRK6), transcript variant 1; solute carrier family 34 (sodium phosphate), member 1 (Slc34a1); transmembrane emp24 prote…
	38111951	38455264	BRM, LMS	Homozygous (1) and Heterozygous Deletion (4)	0.343313	NM_025828:NM_080854:NM_026211:NM_001029886:NM_001004106:NM_011392:NM_017510:NM_019057:NM_003052:NM_016222:NM_029303:NM_001038018:NM_001003258:NM_134059:NM_002082:NM_021489:NM_146045:NM_010106:NM_000505:NM_001114087:NM_007255:NM_145382:NM_011938:NM_001112711:NM_026131:NM_006480:NM_030567:NM_080881:NM_016758:NM_001114088:NM_001004105:NM_005451:NM_013739:NM_024872:NM_213636:NM_004395:NM_006816:NM_20…	lectin, mannose-binding 2 (Lman2); solute carrier family 34 (sodium phosphate), member 3 (Slc34a3); transmembrane emp24 protein transport domain containing 9 (Tmed9); profilin 3 (PFN3); G protein-coupled receptor kinase 6 (GRK6), transcript variant 1; solute carrier family 34 (sodium phosphate), member 1 (Slc34a1); transmembrane emp24 protein transport domain containing 9 (TMED9); hypothetical pr…
	38111951	39153850	SHK	Homozygous Deletion (1)	1.0419	NM_022762:NM_025828:NM_010448:NM_025346:NM_080854:NM_026211:NM_001029886:NM_001004106:NM_011392:NM_017510:NM_019057:NM_005649:NM_003052:NM_001034833:NM_016222:NM_029303:NM_001038018:NM_004499:NM_001003258:NM_134059:NM_002082:NM_021489:NM_146045:NM_015111:NM_010106:NM_028398:NM_153373:NM_001048061:NM_058230:NM_000505:NM_020666:NM_001114087:NM_007255:NM_145382:NM_011938:NM_001112711:NM_026131:NM_14…	required for meiotic nuclear division 5 homolog B (S. cerevisiae) (RMND5B); lectin, mannose-binding 2 (Lman2); heterogeneous nuclear ribonucleoprotein A/B (Hnrnpab), transcript variant 2; required for meiotic nuclear division 5 homolog B (S. cerevisiae) (Rmnd5b); solute carrier family 34 (sodium phosphate), member 3 (Slc34a3); transmembrane emp24 protein transport domain containing 9 (Tmed9); pro…
	38111951	38196071	GIR	Homozygous Deletion (1)	0.08412	NM_025828:NM_080854:NM_001003258:NM_006480:NM_011392:NM_016758:NM_006816:NM_003052	lectin, mannose-binding 2 (Lman2); solute carrier family 34 (sodium phosphate), member 3 (Slc34a3); familiaris lectin, mannose-binding 2 (LMAN2); regulator of G-protein signaling 14 (RGS14); solute carrier family 34 (sodium phosphate), member 1 (Slc34a1); regulator of G-protein signaling 14 (Rgs14); lectin, mannose-binding 2 (LMAN2); solute carrier family 34 (sodium phosphate), member 1 (SLC34A1)
	38378920	39025819	GIR	Homozygous Deletion (1)	0.646899	NM_022762:NM_010448:NM_025346:NM_007255:NM_026211:NM_145974:NM_017510:NM_001034833:NM_004499:NM_017838:NM_146045:NM_015111:NM_010106:NM_026631:NM_031266:NM_173465:NM_028398:NM_153373:NM_001048061:NM_153393	required for meiotic nuclear division 5 homolog B (S. cerevisiae) (RMND5B); heterogeneous nuclear ribonucleoprotein A/B (Hnrnpab), transcript variant 2; required for meiotic nuclear division 5 homolog B (S. cerevisiae) (Rmnd5b); xylosylprotein beta 1,4-galactosyltransferase, polypeptide 7 (galactosyltransferase I) (B4GALT7); transmembrane emp24 protein transport domain containing 9 (Tmed9); RIKEN…
	69581226	69708703	HOL	Homozygous Deletion (1)	0.127477
	69869122	69869122	ANG, NDA	Homozygous Deletion (2)	0
	77241643	78028059	SHK, BRM, NDA, GIR, RGU, ANG	Homozygous (1) and Heterozygous Deletion (2), Heterozygous Insertion (3)	0.786416
	77291720	77567102	BMA	Homozygous Deletion (1)	0.275382
	76442440	78028059	SHK, BMA, BRM, NDA, GIR, RGU, ANG	Homozygous (1) and Heterozygous Deletion (3), Heterozygous Insertion (3)	1.58562	NM_001003116:NM_182506:NM_020018:NM_020020:NM_020019	familiaris melanoma antigen family B, 10 (MAGEB10); melanoma antigen family B, 10 (MAGEB10); melanoma antigen, family A, 5 (Magea5); melanoma antigen, family A, 8 (Magea8); melanoma antigen, family A, 6 (Magea6)
8	2087139	13137825	SHK	Homozygous Deletion (1)	11.0507
9	9735203	9735203	NEL, GIR	Homozygous Deletion (2)	0
	48030162	48118722	NDA	Homozygous Deletion (1)	0.08856
	80354719	80931819	LMS	Homozygous Deletion (1)	0.5771
11	33479953	34369442	SHK	Homozygous Deletion (1)	0.889489	NM_004801:NM_020252:NM_138735	neurexin 1 (NRXN1), transcript variant alpha1; neurexin I (Nrxn1);neurexin 1 (NRXN1), transcript variant beta
	41914280	42048887	SGT	Homozygous Deletion (1)	0.134607
12	33523513	40540347	SHK	Homozygous Deletion (1)	7.01683	NM_152726:NM_175605:NM_014572:NM_031277:NM_028643:NM_004004:NM_001033043:NM_030004:NM_138284:NM_153023:NM_001039650:NM_000231:NM_015974:NM_003453:NM_183175:NM_001081377:NM_009376:NM_028113:NM_001007537:NM_001014996:NM_153251:NM_001014276:NM_001110220:NM_013869:NM_009119:NM_026526:NM_013518:NM_001008564:NM_006783:NM_199138:NM_025459:NM_197968:NM_017520:NM_029492:NM_178540:NM_018451:NM_152704:NM_20…	EF-hand domain family, member A1 (EFHA1); intraflagellar transport 88 homolog (Chlamydomonas) (IFT88), transcript variant 1; LATS, large tumor suppressor, homolog 2 (Drosophila) (LATS2); ring finger protein 17 (RNF17); EF hand domain family A1 (Efha1); gap junction protein, beta 2, 26kDa (GJB2); ring finger protein 17 (Rnf17); crystallin, lambda 1 (Cryl1); interleukin 17D (IL17D); spermatogenesis…
	40137612	40163758	GIR	Homozygous Deletion (1)	0.026146
	65288904	65288904	NDA	Homozygous Deletion (1)	0
	66116357	66116357	LMS, RGU, SHK, JER, CHL, JER, CHL, SGT	Homozygous Deletion (5), Heterozygous Insertion (3)	0
	66116357	66186011	JER, GIR, ANG, BSW	Homozygous Deletion (2), Heterozygous Insertion (2)	0.069654
	66116357	66357779	JER, RGU, ANG, LMS, HOL, SHK, CHL, BSW	Homozygous Deletion (10), Heterozygous Insertion (6)	0.241422
	67829827	67829827	HOL, SGT, RGU	Homozygous Deletion (1), Heterozygous Insertion (3)	0
	67829827	67888720	HOL, SHK, BSW, JER, BRM, NDA, BMA, LMS	Homozygous Deletion (3), Heterozygous (6) and Homozygous Insertion (3)	0.058893
	76506692	76531991	BRM	Homozygous Deletion (1)	0.025299
13	16155865	16302809	BRM	Homozygous Deletion (3)	0.146944	NM_000417:NM_008367:NM_032905:NM_001003211:NM_152824	interleukin 2 receptor, alpha (IL2RA); interleukin 2 receptor, alpha chain (Il2ra); RNA binding motif protein 17 (RBM17), transcript variant 1; familiaris interleukin 2 receptor, alpha (IL2RA); RNA binding motif protein 17 (Rbm17)
14	12779154	13548142	GIR, BSW, NDA	Homozygous Deletion (1), Heterozygous Insertion (3)	0.768988	NM_174911:NM_001122977	family with sequence similarity 84, member B (FAM84B); predicted gene, EG635895 (EG635895)
	12779154	12887433	NEL, NDA, BSW	Homozygous Deletion (1), Heterozygous Insertion (2)	0.108279
	12887433	12887433	GIR, BMA, BRM, SHK, JER, NDA, BSW	Homozygous Deletion (9), Heterozygous Insertion (2)	0
	12887433	13548142	SGT, SHK	Homozygous Deletion (2)	0.660709	NM_174911:NM_001122977	family with sequence similarity 84, member B (FAM84B); predicted gene, EG635895 (EG635895)
15	6035330	8819796	SHK, BMA, HFD, NDA	Homozygous (1) and Heterozygous Deletion (3)	2.78447	NM_175566:NM_000926:NM_014361:NM_001003074:NM_008829	contactin 5 (CNTN5), transcript variant 2; progesterone receptor (PGR);contactin 5 (CNTN5), transcript variant 1; familiaris progesterone receptor (PGR); progesterone receptor (Pgr)
	6151104	7681231	CHL, BMA, HFD	Homozygous (1) and Heterozygous Deletion (2)	1.53013	NM_175566:NM_000926:NM_014361:NM_001003074:NM_008829	contactin 5 (CNTN5), transcript variant 2; progesterone receptor (PGR);contactin 5 (CNTN5), transcript variant 1; familiaris progesterone receptor (PGR); progesterone receptor (Pgr)
	6203208	8325773	LMS, BMA	Homozygous (1) and Heterozygous Deletion (1)	2.12256	NM_175566:NM_000926:NM_014361:NM_001003074:NM_008829	contactin 5 (CNTN5), transcript variant 2; progesterone receptor (PGR);contactin 5 (CNTN5), transcript variant 1; familiaris progesterone receptor (PGR); progesterone receptor (Pgr)
	6228750	7473943	HOL	Homozygous Deletion (1)	1.24519	NM_175566:NM_000926:NM_014361:NM_001003074:NM_008829	contactin 5 (CNTN5), transcript variant 2; progesterone receptor (PGR);contactin 5 (CNTN5), transcript variant 1; familiaris progesterone receptor (PGR); progesterone receptor (Pgr)
	62562106	62649623	JER	Homozygous Deletion (1)	0.087517
	74194755	74256652	BRM	Homozygous Deletion (1)	0.061897	NM_001033452	1-aminocyclopropane-1-carboxylate synthase homolog (Arabidopsis)(non-functional)-like (Accsl)
16	12364535	12364535	GIR, BRM, LMS	Homozygous Deletion (3)	0
17	69348481	69507171	GIR	Homozygous Deletion (1)	0.15869
19	1056643	1056643	LMS	Homozygous Deletion (1)	0
21	13436819	13554967	SHK	Homozygous Deletion (1)	0.118148
	37811056	38340078	HFD	Homozygous Deletion (1)	0.529022
	38131245	38340078	GIR	Homozygous Deletion (1)	0.208833
	38131245	38167829	GIR	Homozygous Deletion (2)	0.036584
	62599733	62719580	HOL	Homozygous Deletion (1)	0.119847
22	51864028	52306700	SGT	Homozygous Deletion (1)	0.442672	NM_080437:NM_000387:NM_006321:NM_001008269:NM_207634:NM_031392:NM_008924:NM_001005911:NM_177938:NM_011790:NM_199069:NM_184231:NM_001005910:NM_011297:NM_004157:NM_018114:NM_001123040:NM_207635:NM_028944:NM_030729:NM_199074:NM_022911:NM_016291:NM_020520:NM_199417:NM_018031:NM_001040454:NM_134420:NM_021884:NM_134263:NM_029634:NM_016453:NM_177939:NM_199073:NM_199070:NM_001407:NM_001009996:NM_00100590…	cadherin, EGF LAG seven-pass G-type receptor 3 (flamingo homolog, Drosophila) (Celsr3); solute carrier family 25 (carnitine/acylcarnitine translocase), member 20 (SLC25A20), nuclear gene encoding mitochondrial protein; ariadne homolog 2 (Drosophila) (ARIH2); transmembrane protein 89 (TMEM89); ribosomal protein S24 (Rps24), transcript variant 2; WD repeat domain 6 (Wdr6); protein kinase, cAMP depe…
23	14599482	14655067	GIR	Homozygous Deletion (1)	0.055585
	18278550	18940175	SHK, ANG	Homozygous (1) and Heterozygous Deletion (1)	0.661625	NM_001013767:NM_001003367:NM_178652:NM_008302:NM_007058:NM_032111:NM_198608:NM_001078177:NM_152810:NM_145026:NM_022880:NM_008690:NM_013688:NM_181356:NM_001078174:NM_028662:NM_001078175:NM_020745:NM_182539:NM_001078176:NM_001127499:NM_198167:NM_003599:NM_001013749:NM_001253:NM_004955:NM_018426:NM_007355:NM_026732:NM_004556:NM_178148	calpain 11 (Capn11); familiaris solute carrier family 29 (nucleoside transporters), member 1 (SLC29A1), nuclear gene encoding mitochondrial protein; suppressor of Ty 3 homolog (S. cerevisiae) (Supt3h); heat shock protein 90 alpha (cytosolic), class B member 1 (Hsp90ab1); calpain 11 (CAPN11); mitochondrial ribosomal protein L14 (MRPL14), nuclear gene encoding mitochondrial protein; alanyl-tRNA syn…
	18608013	19074489	HFD, NDA, ANG	Homozygous (1) and Heterozygous Deletion (2)	0.466476	NM_181356:NM_178652:NM_003599	calpain 11 (Capn11); familiaris solute carrier family 29 (nucleoside transporters), member 1 (SLC29A1), nuclear gene encoding mitochondrial protein; suppressor of Ty 3 homolog (S. cerevisiae) (Supt3h)
	18608013	18986650	HOL, ANG	Homozygous (1) and Heterozygous Deletion (1)	0.378637	NM_181356:NM_178652:NM_003599	calpain 11 (Capn11); familiaris solute carrier family 29 (nucleoside transporters), member 1 (SLC29A1), nuclear gene encoding mitochondrial protein; suppressor of Ty 3 homolog (S. cerevisiae) (Supt3h)
	21154987	21595207	SGT	Homozygous Deletion (1)	0.44022	NM_153839:NM_001033493:NM_001030051:NM_012120:NM_009847:NM_181744:NM_181753:NM_153838	G protein-coupled receptor 111 (GPR111); G protein-coupled receptor 111 (Gpr111); opsin 5 (OPN5), transcript variant 2; CD2-associated protein (CD2AP); CD2-associated protein (Cd2ap); opsin 5 (OPN5), transcript variant 1; opsin 5 (Opn5); G protein-coupled receptor 115 (GPR115)
24	5247792	5309688	HFD	Homozygous Deletion (1)	0.061896
	25418193	27045279	SHK	Homozygous Deletion (1)	1.62709
26	5205483	5554999	BMA	Homozygous Deletion (1)	0.349516
27	6359806	7772186	SHK, GIR, RGU	Homozygous (1) and Heterozygous Deletion (1), Homozygous Insertion (1)	1.41238	NM_018661:NM_001081551:NM_001081662:NM_001025353:NM_004942:NM_079835:NM_001037751:NM_001111094:NM_019602:NM_001039119:NR_002880	defensin, beta 103A (DEFB103A); defensin, beta 103B (DEFB103B); expressed sequence C86695 (C86695); predicted gene, EG574083 (EG574083); defensin, beta 4 (DEFB4); butyrophilin-like 2 (Btnl2); predicted gene, EG432867 (EG432867); butyrophilin-like 1 (Btnl1); butyrophilin-like 2 (MHC class II associated) (BTNL2); predicted gene, EG654453 (EG654453); predicted gene, EG654455 (EG654455), non-coding R…
	6533859	7824635	NDA, GIR, RGU, SHK	Homozygous (1) and Heterozygous Deletion (1), Heterozygous (1) and Homozygous Insertion (1)	1.29078	NM_018661:NM_001081551:NM_001081662:NM_001025353:NM_004942:NM_001037751:NR_002880:NM_001039119	defensin, beta 103A (DEFB103A); defensin, beta 103B (DEFB103B); expressed sequence C86695 (C86695); predicted gene, EG574083 (EG574083); defensin, beta 4 (DEFB4); predicted gene, EG432867 (EG432867); predicted gene, EG654455 (EG654455), non-coding RNA; predicted gene, EG654453 (EG654453)
	6568926	7772186	SHK, HFD, GIR	Homozygous Deletion (2), Homozygous Insertion (1)	1.20326	NM_018661:NM_001081551:NM_001081662:NM_001025353:NM_004942:NM_001037751:NR_002880:NM_001039119	defensin, beta 103A (DEFB103A); defensin, beta 103B (DEFB103B); expressed sequence C86695 (C86695); predicted gene, EG574083 (EG574083); defensin, beta 4 (DEFB4); predicted gene, EG432867 (EG432867); predicted gene, EG654455 (EG654455), non-coding RNA; predicted gene, EG654453 (EG654453)
	6856543	7824635	LMS	Homozygous Deletion (1)	0.968092	NM_001081662:NM_001025353:NM_001037751:NM_001039119:NM_004942	expressed sequence C86695 (C86695); predicted gene, EG574083 (EG574083); predicted gene, EG432867 (EG432867); predicted gene, EG654453 (EG654453); defensin, beta 4 (DEFB4)
	7329494	7329494	HFD	Homozygous Deletion (1)
	28605214	28605214	BMA	Homozygous Deletion (1)
28	9283530	10850905	SHK	Homozygous Deletion (1)	1.56737	NM_033269	cholinergic receptor, muscarinic 3, cardiac (Chrm3)
	32369153	32399468	BRM, NEL	Homozygous Deletion (2)	0.030315
